# Supplementary material
Source: PubMed Central journal article supplement (PMC4593098)

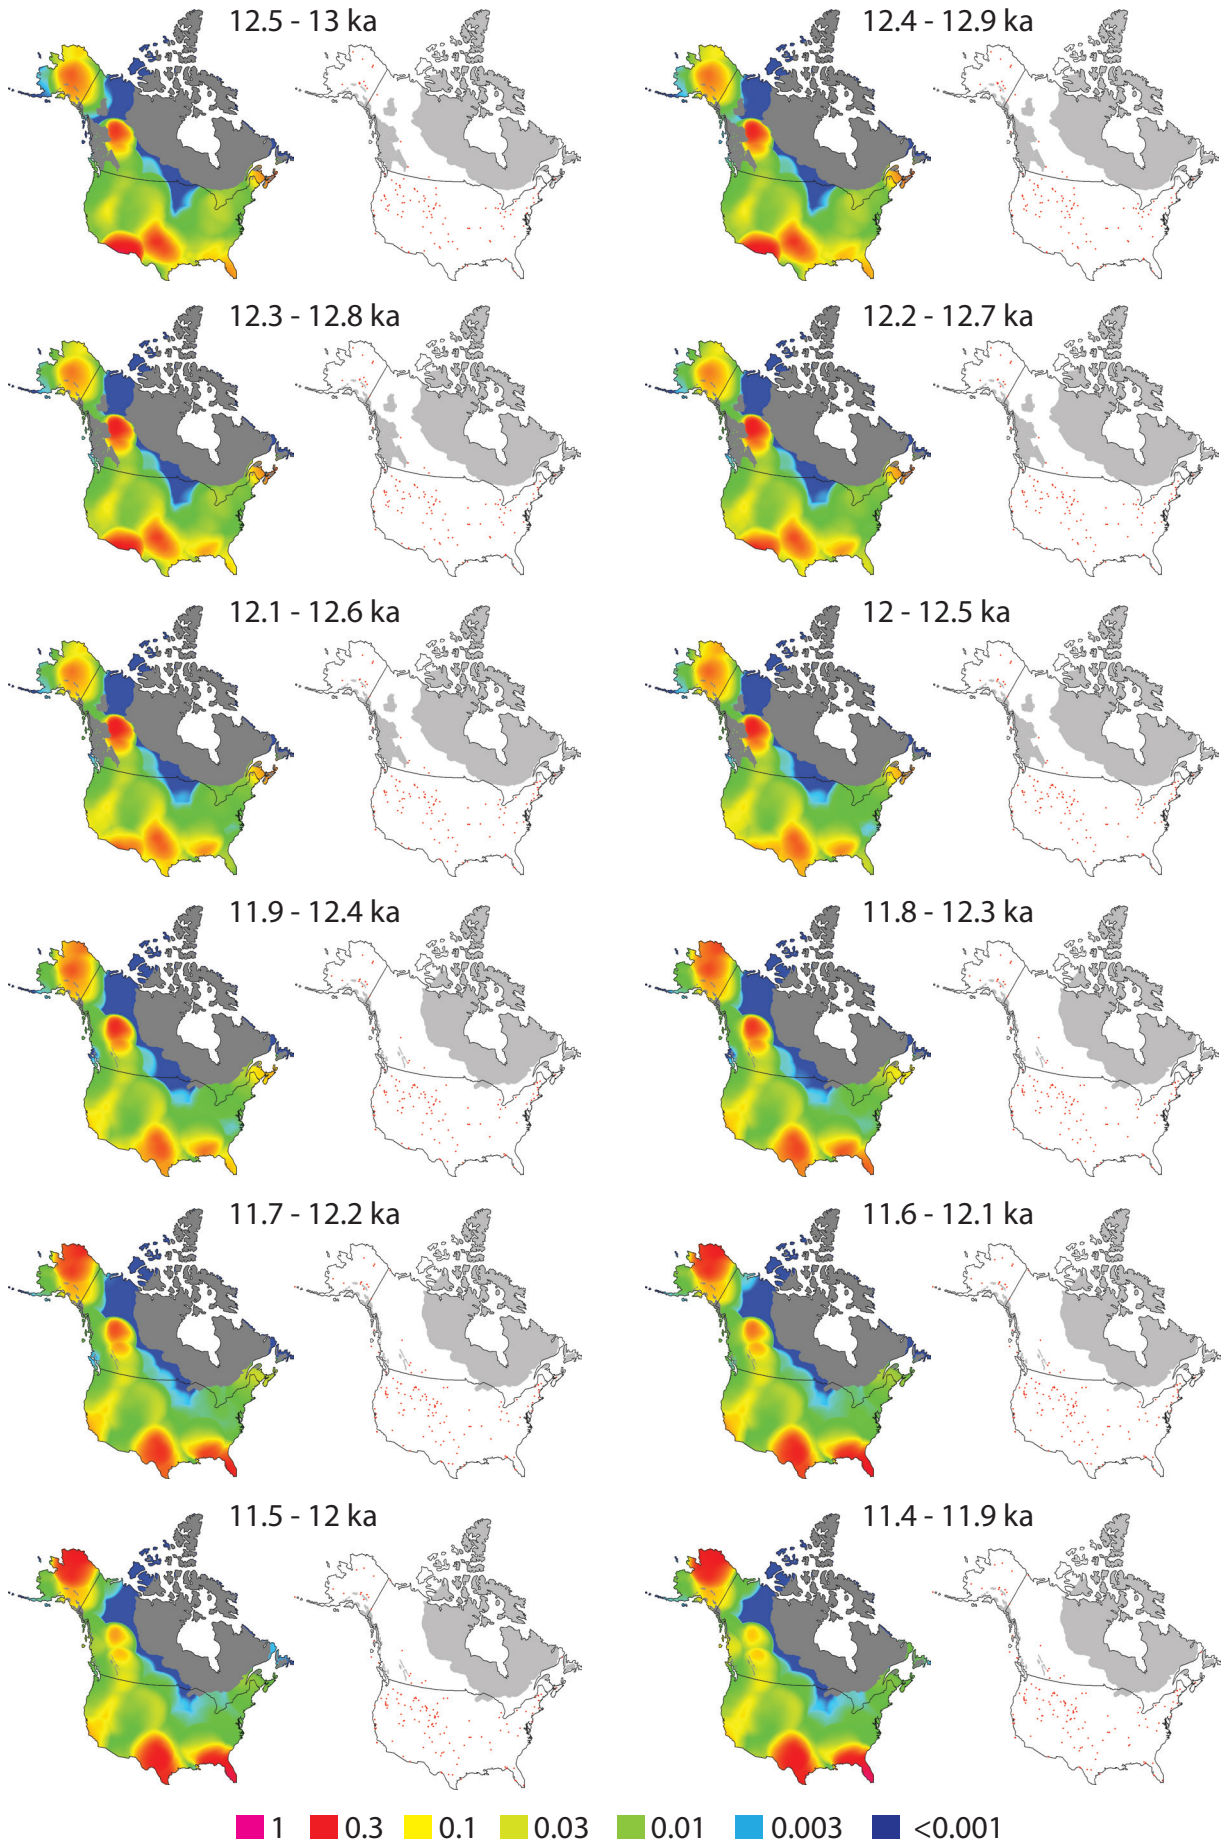

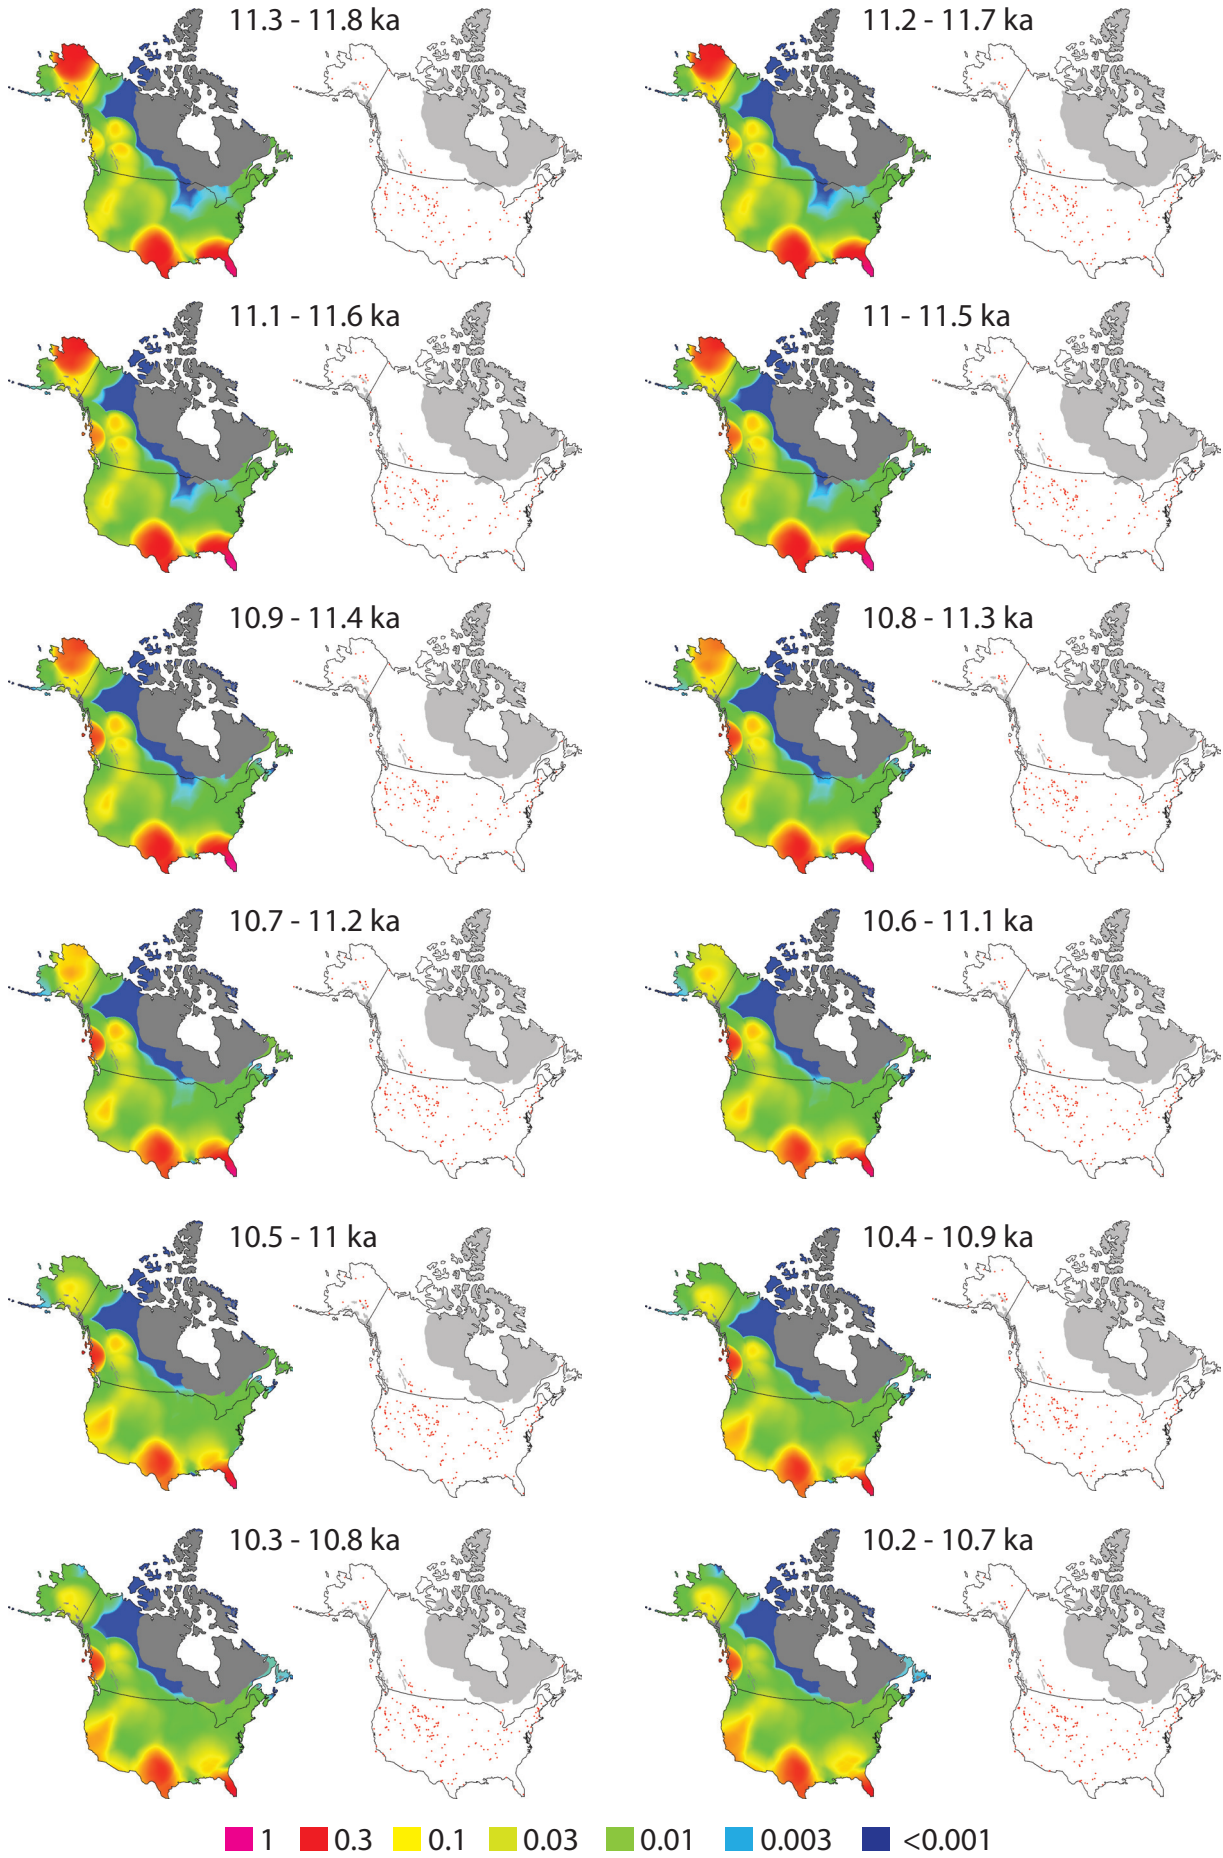

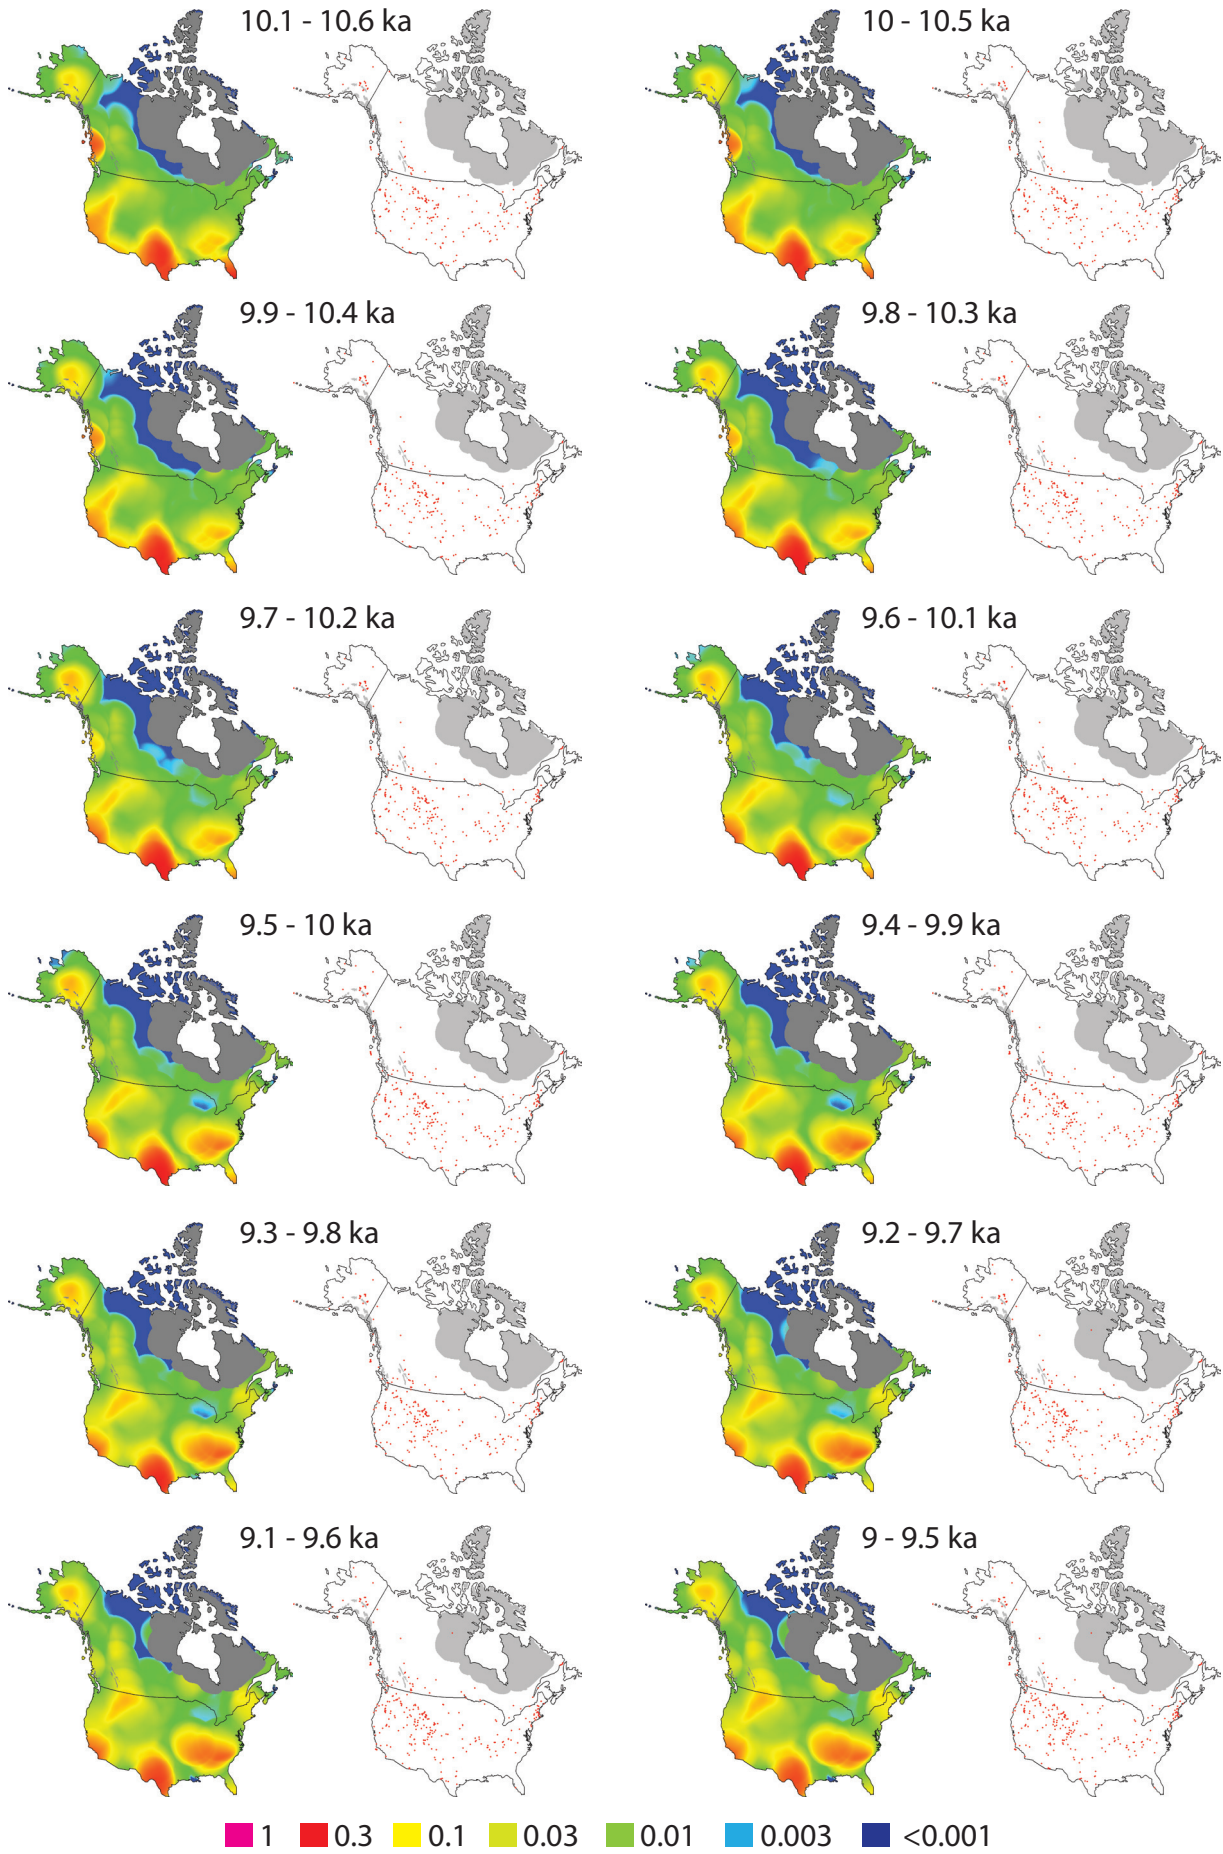

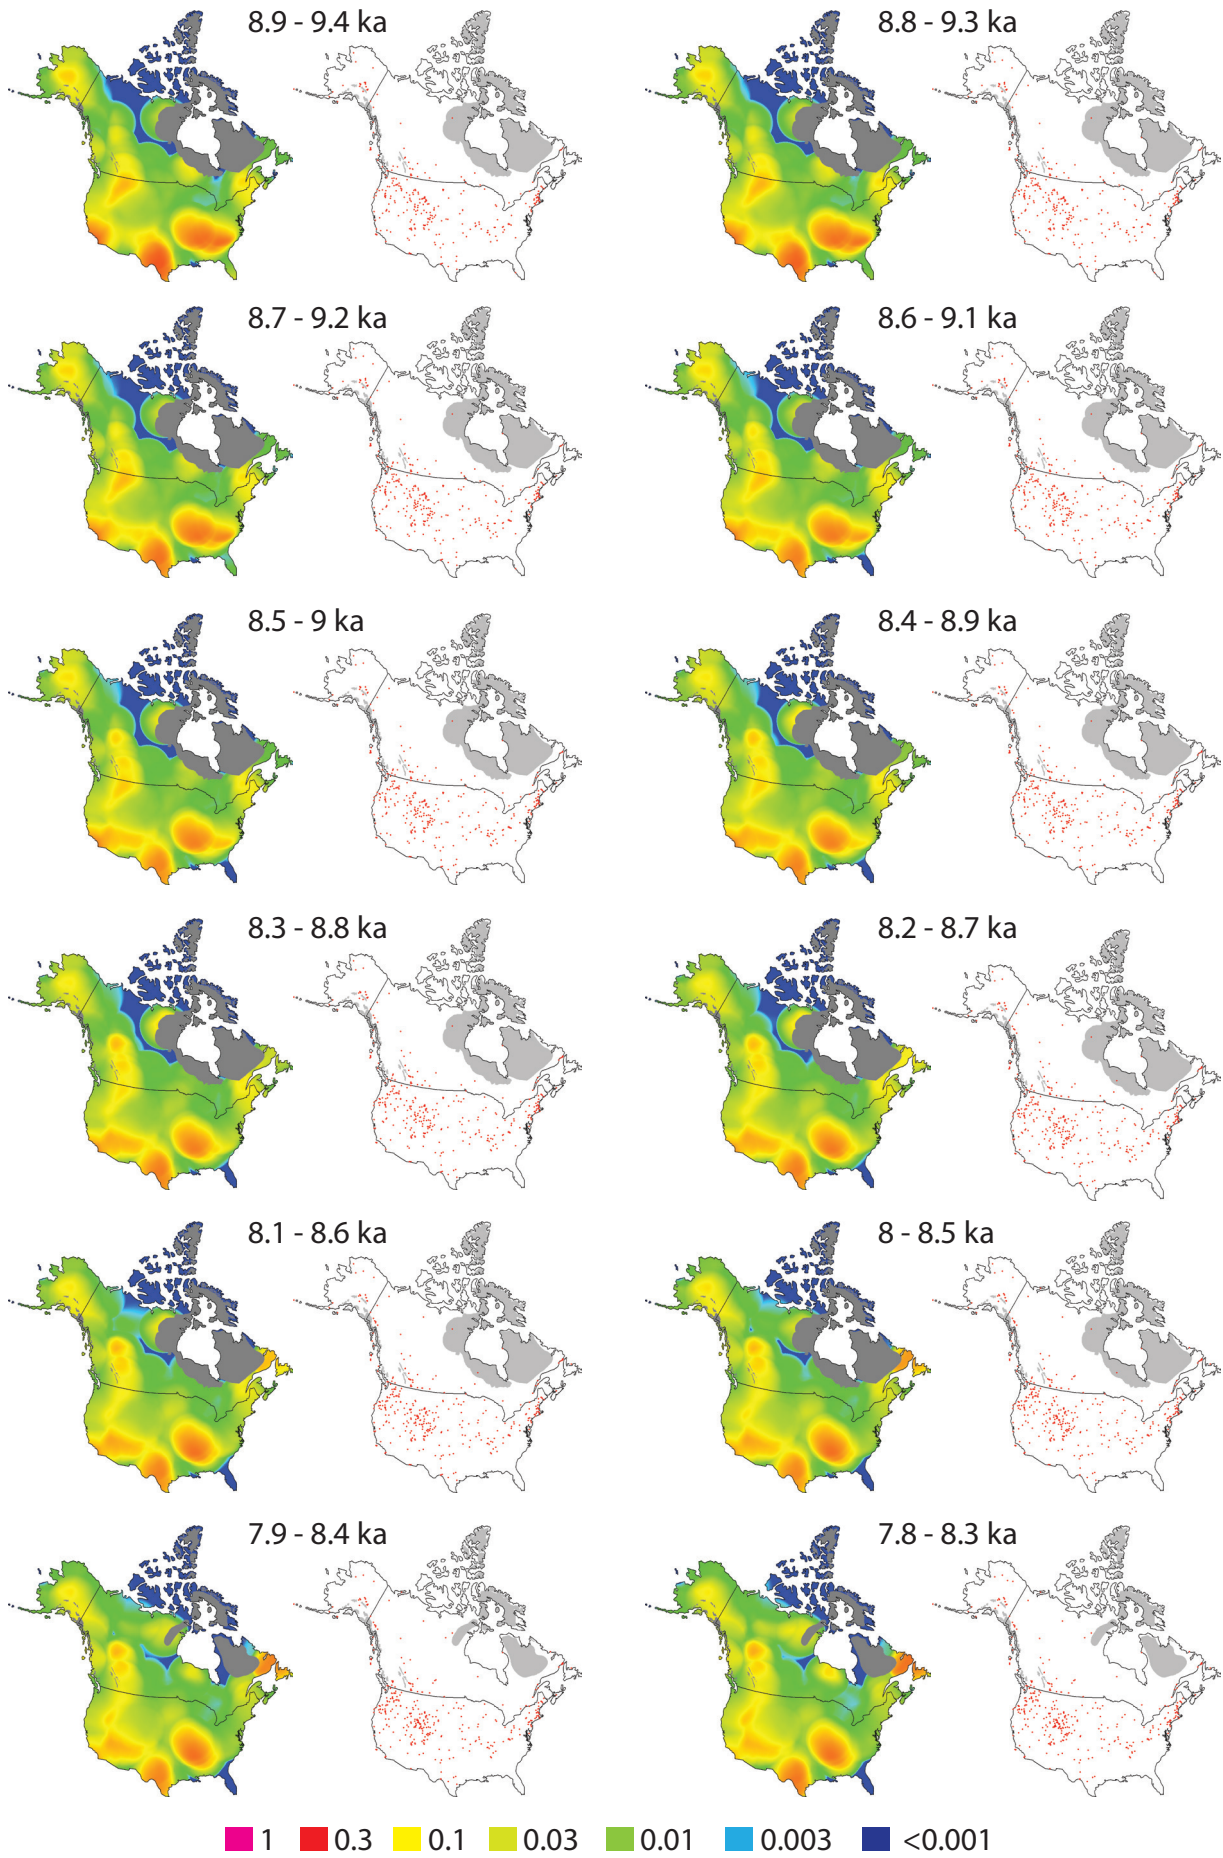

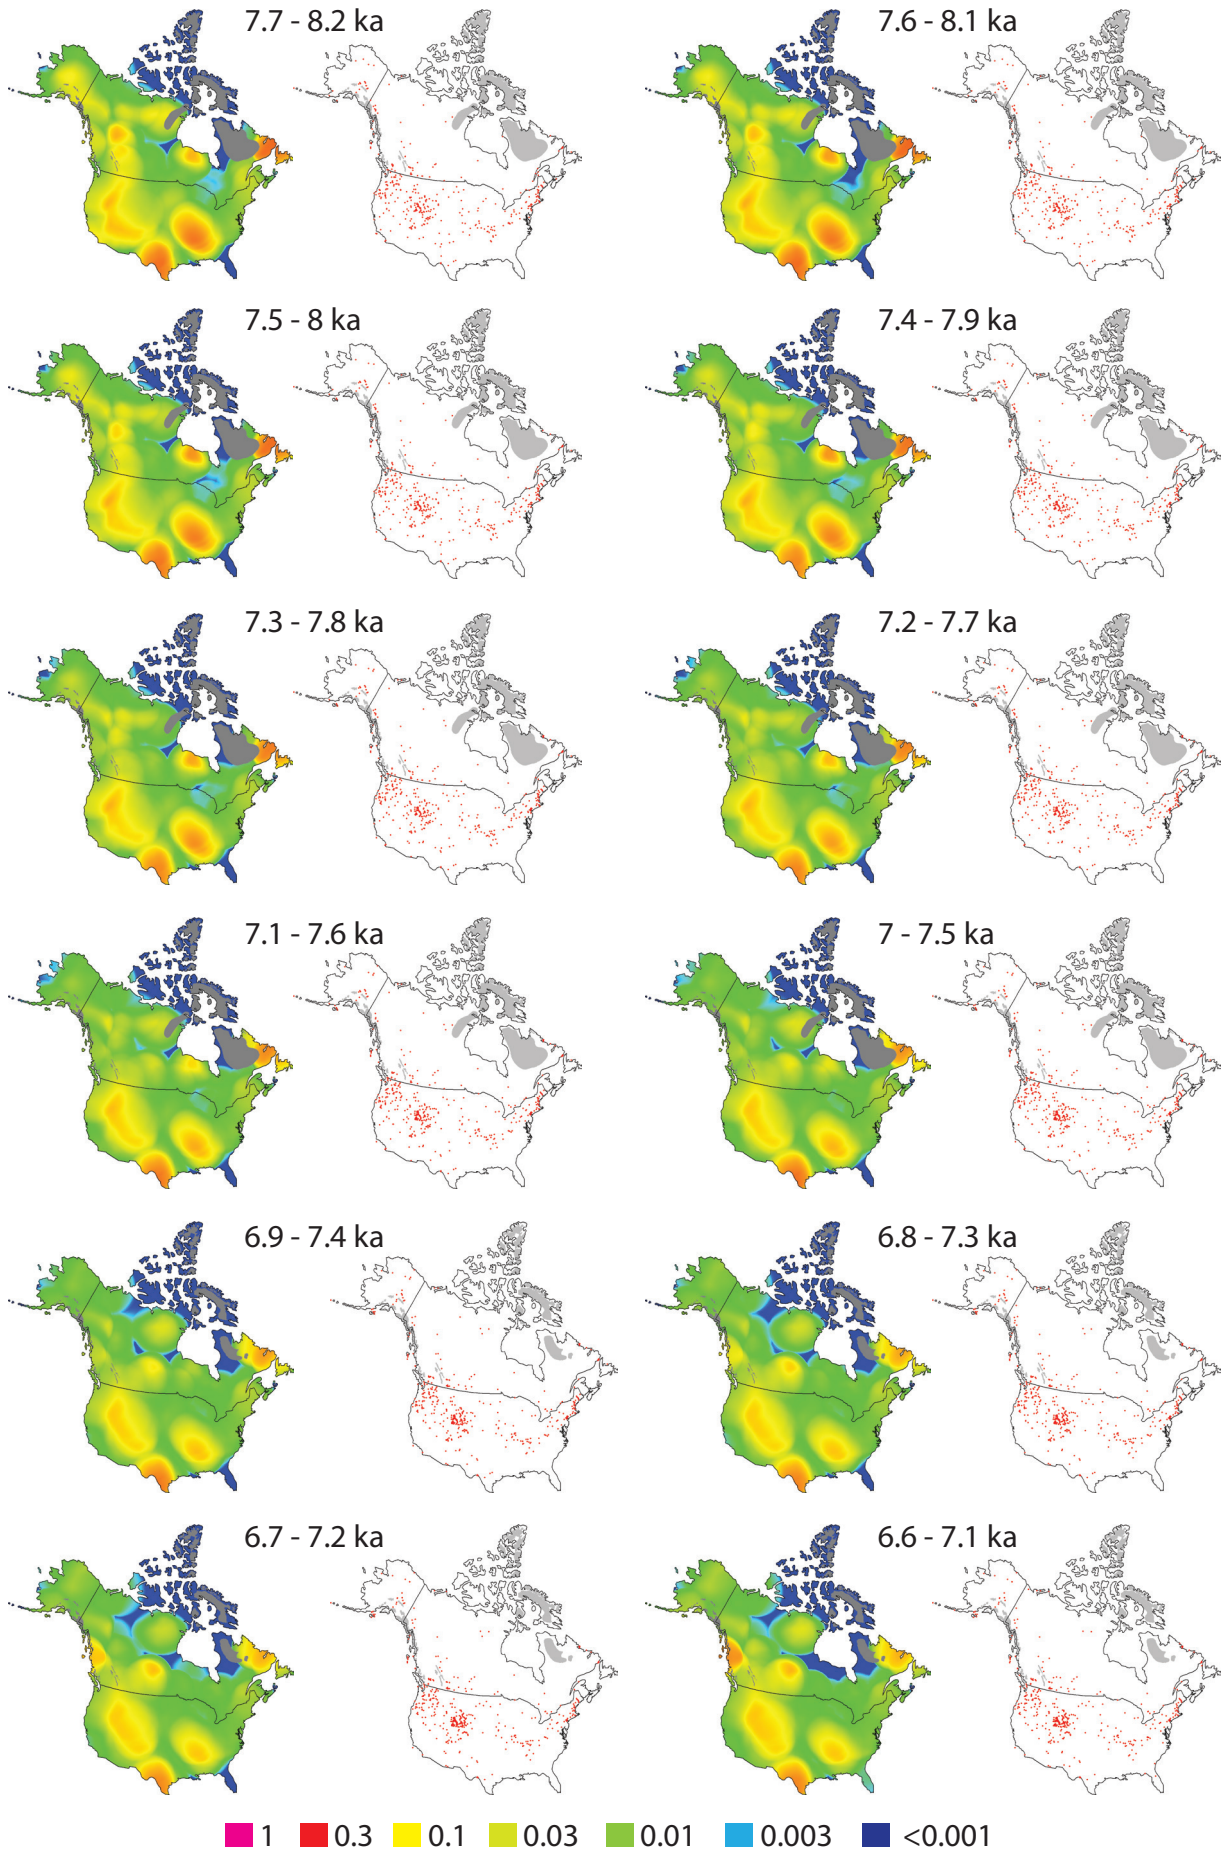

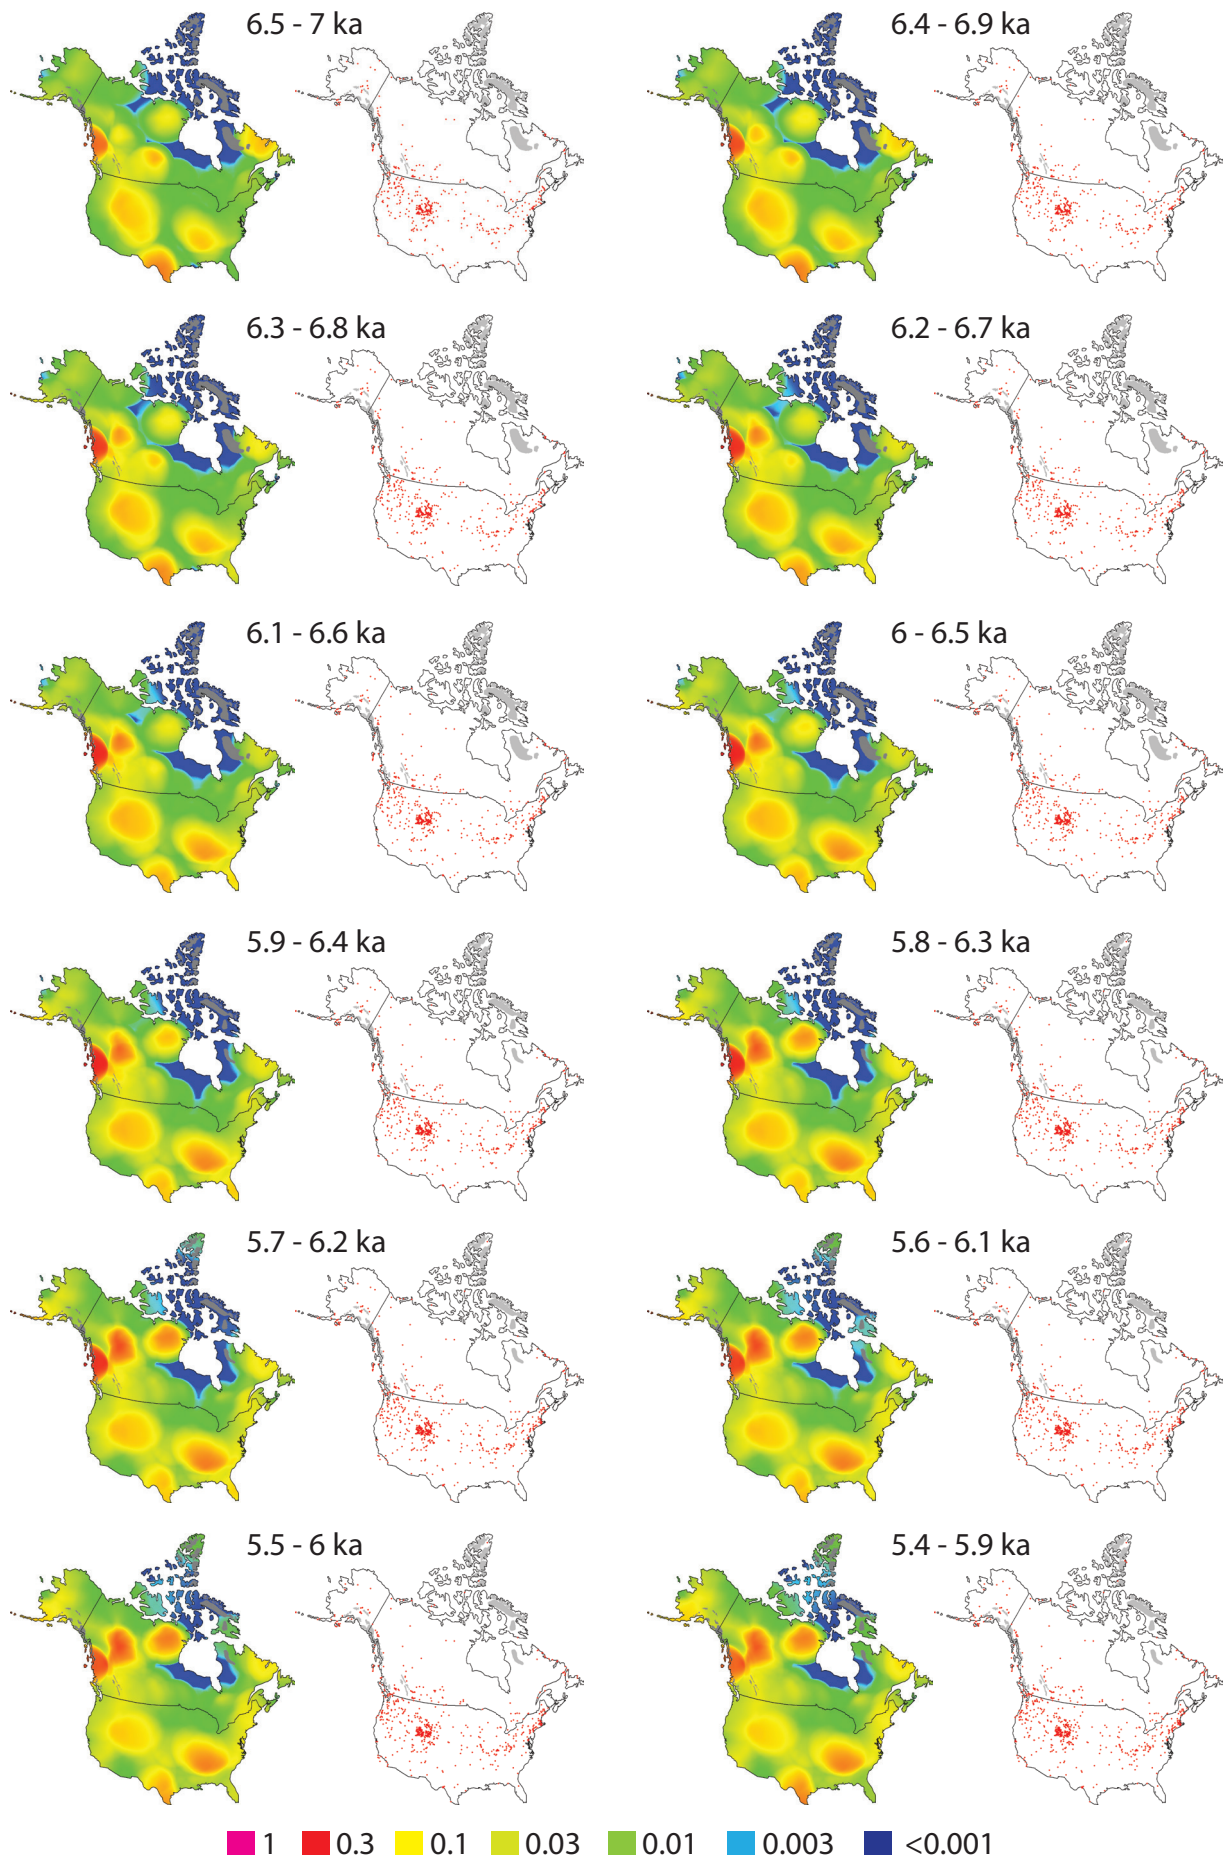

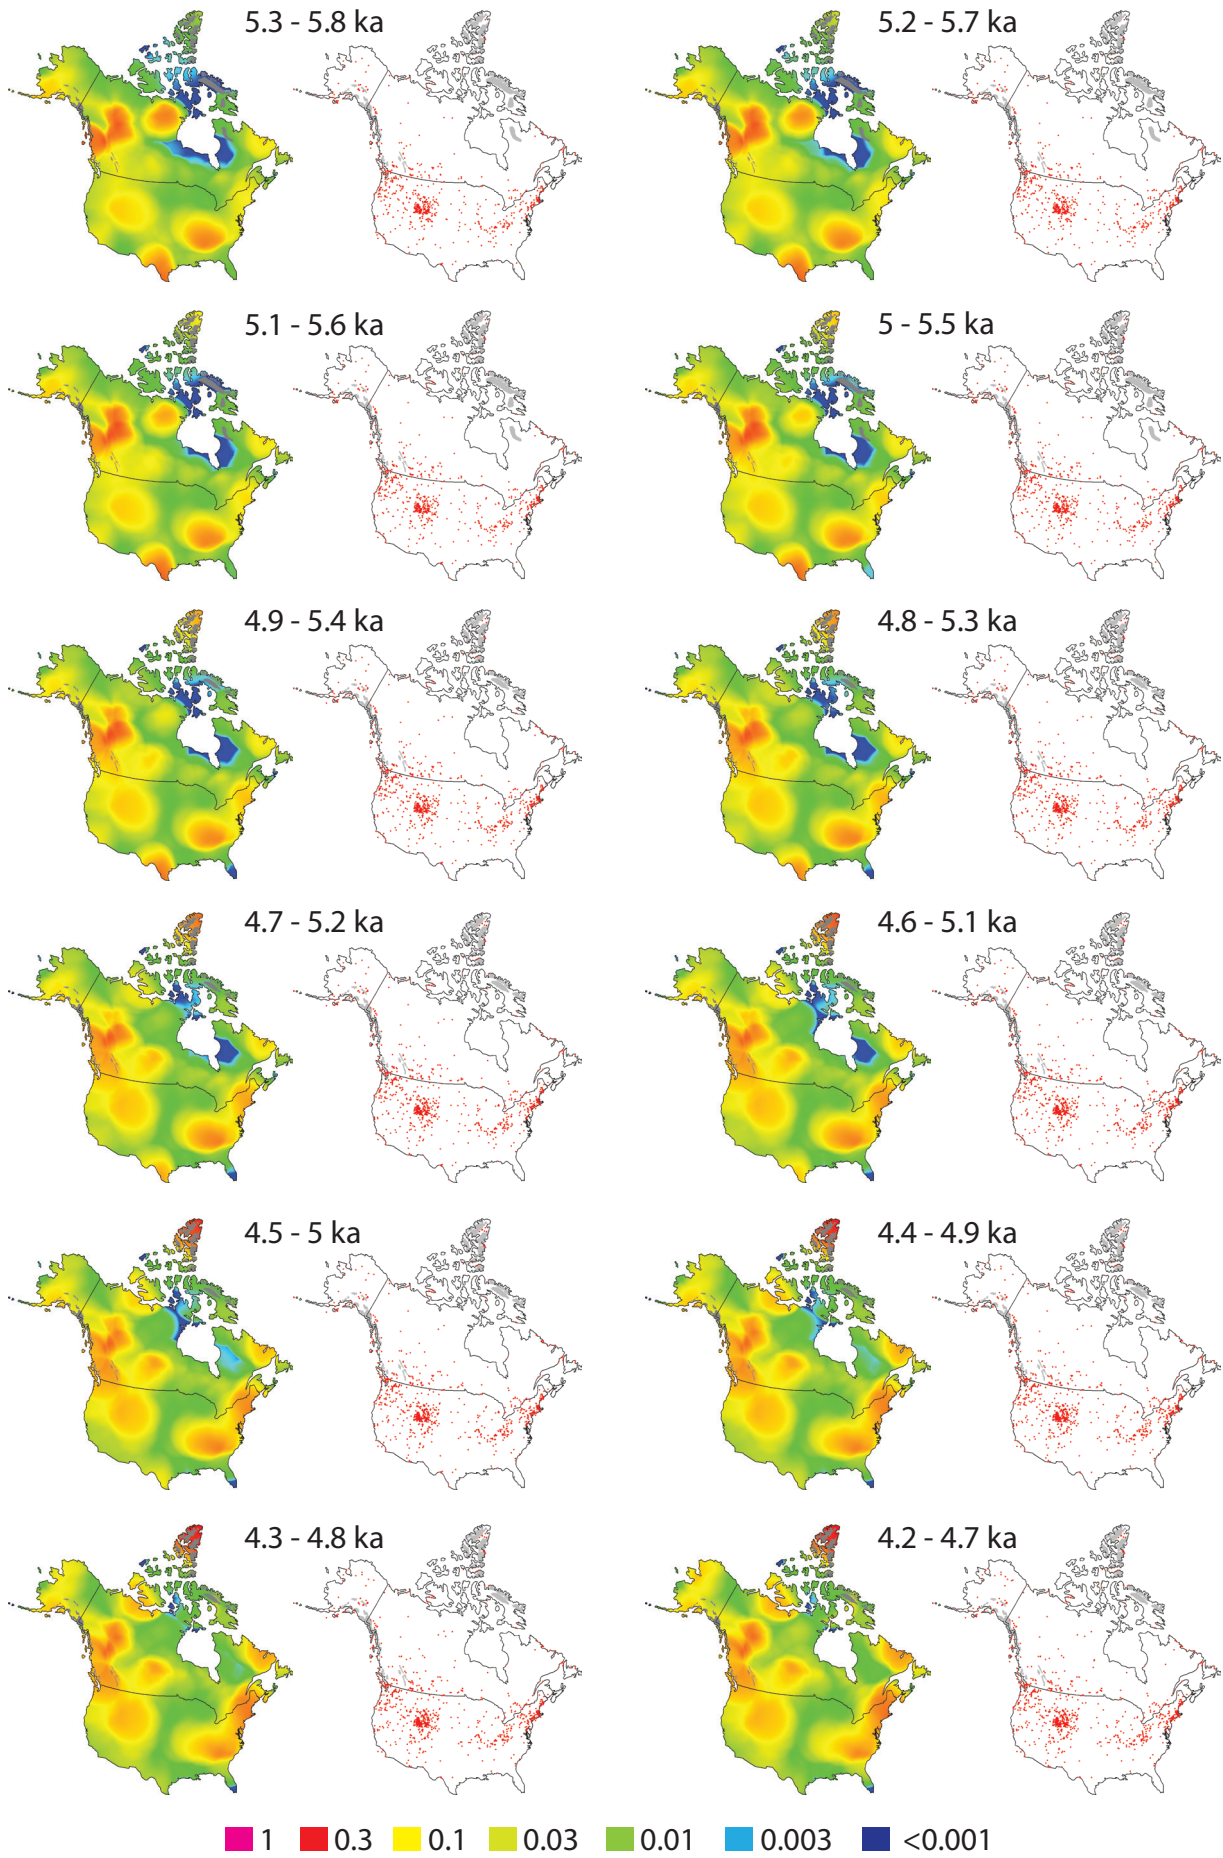

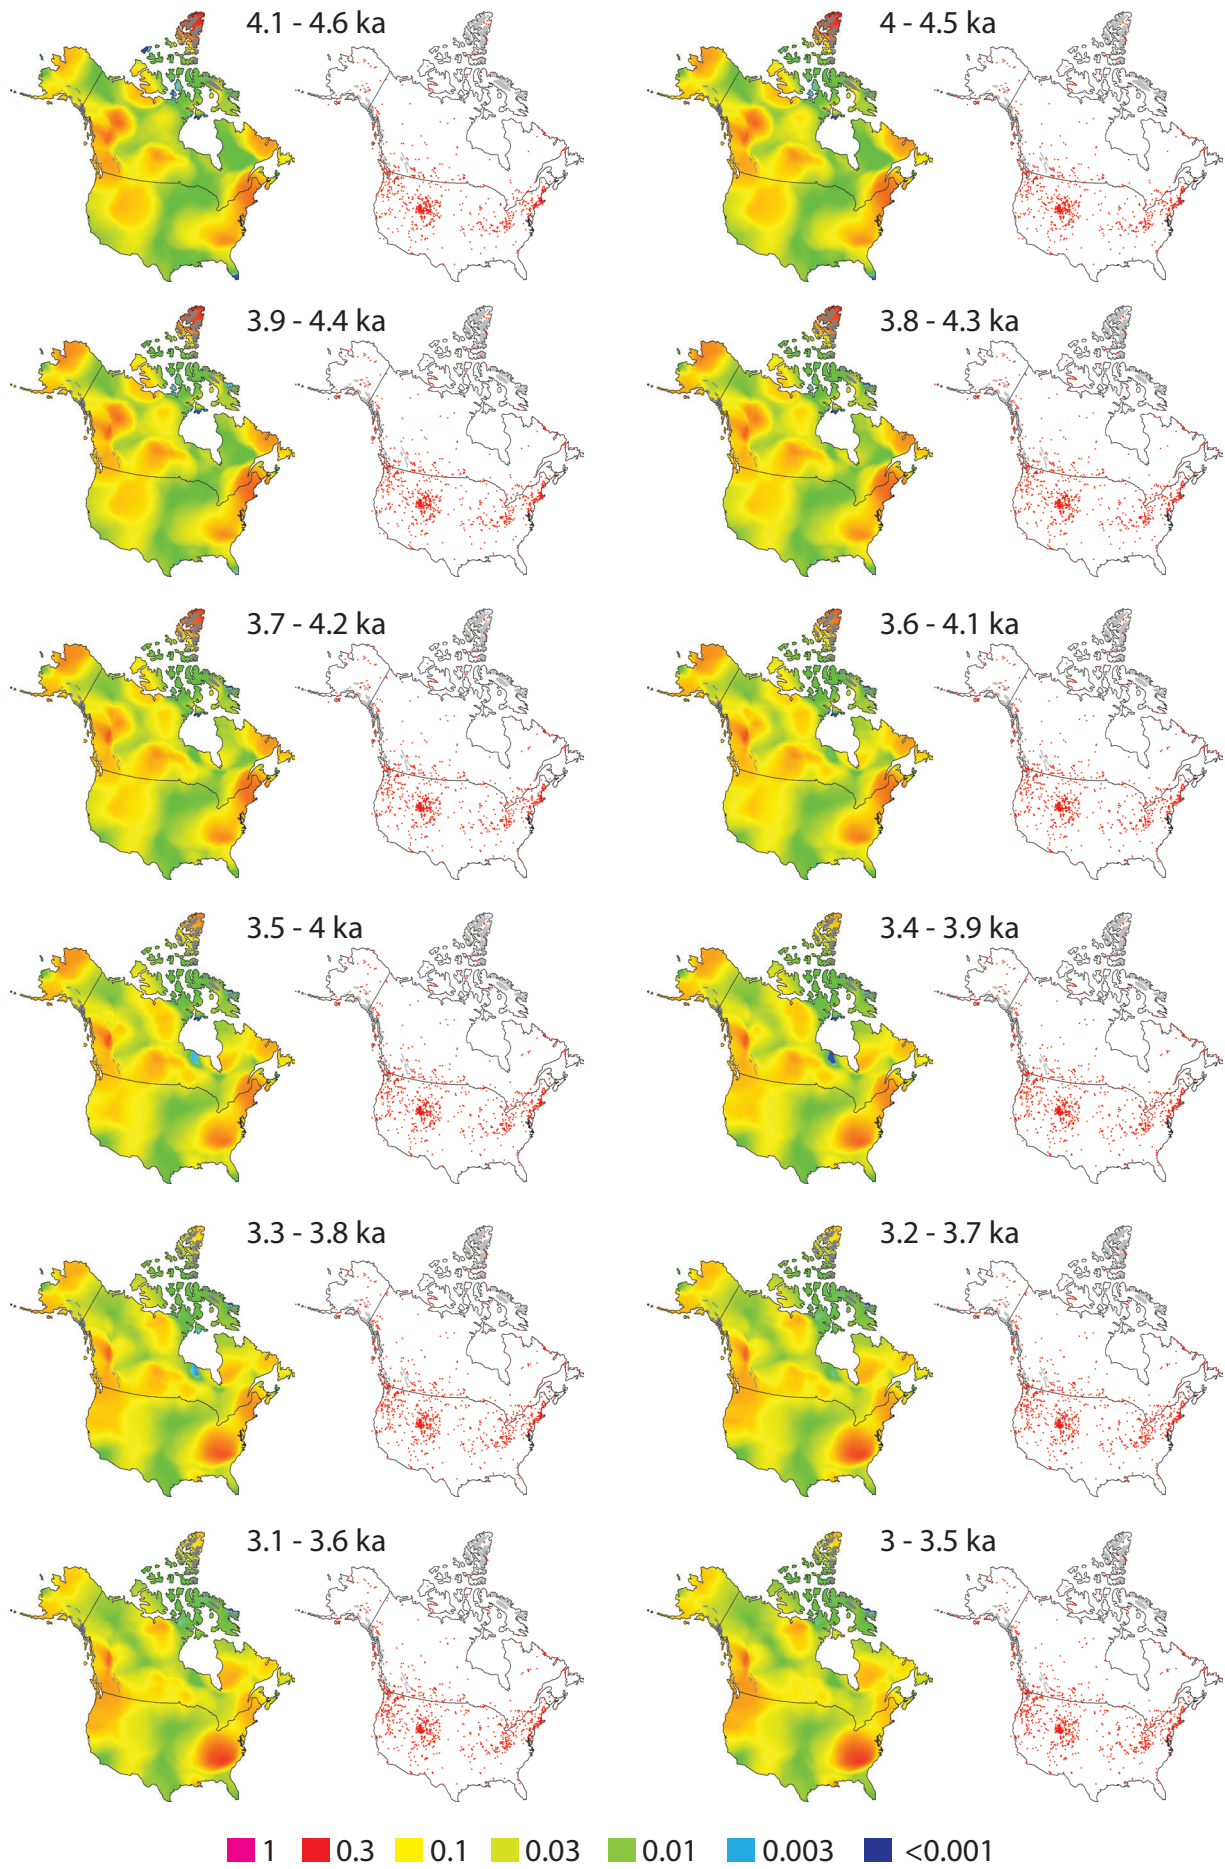



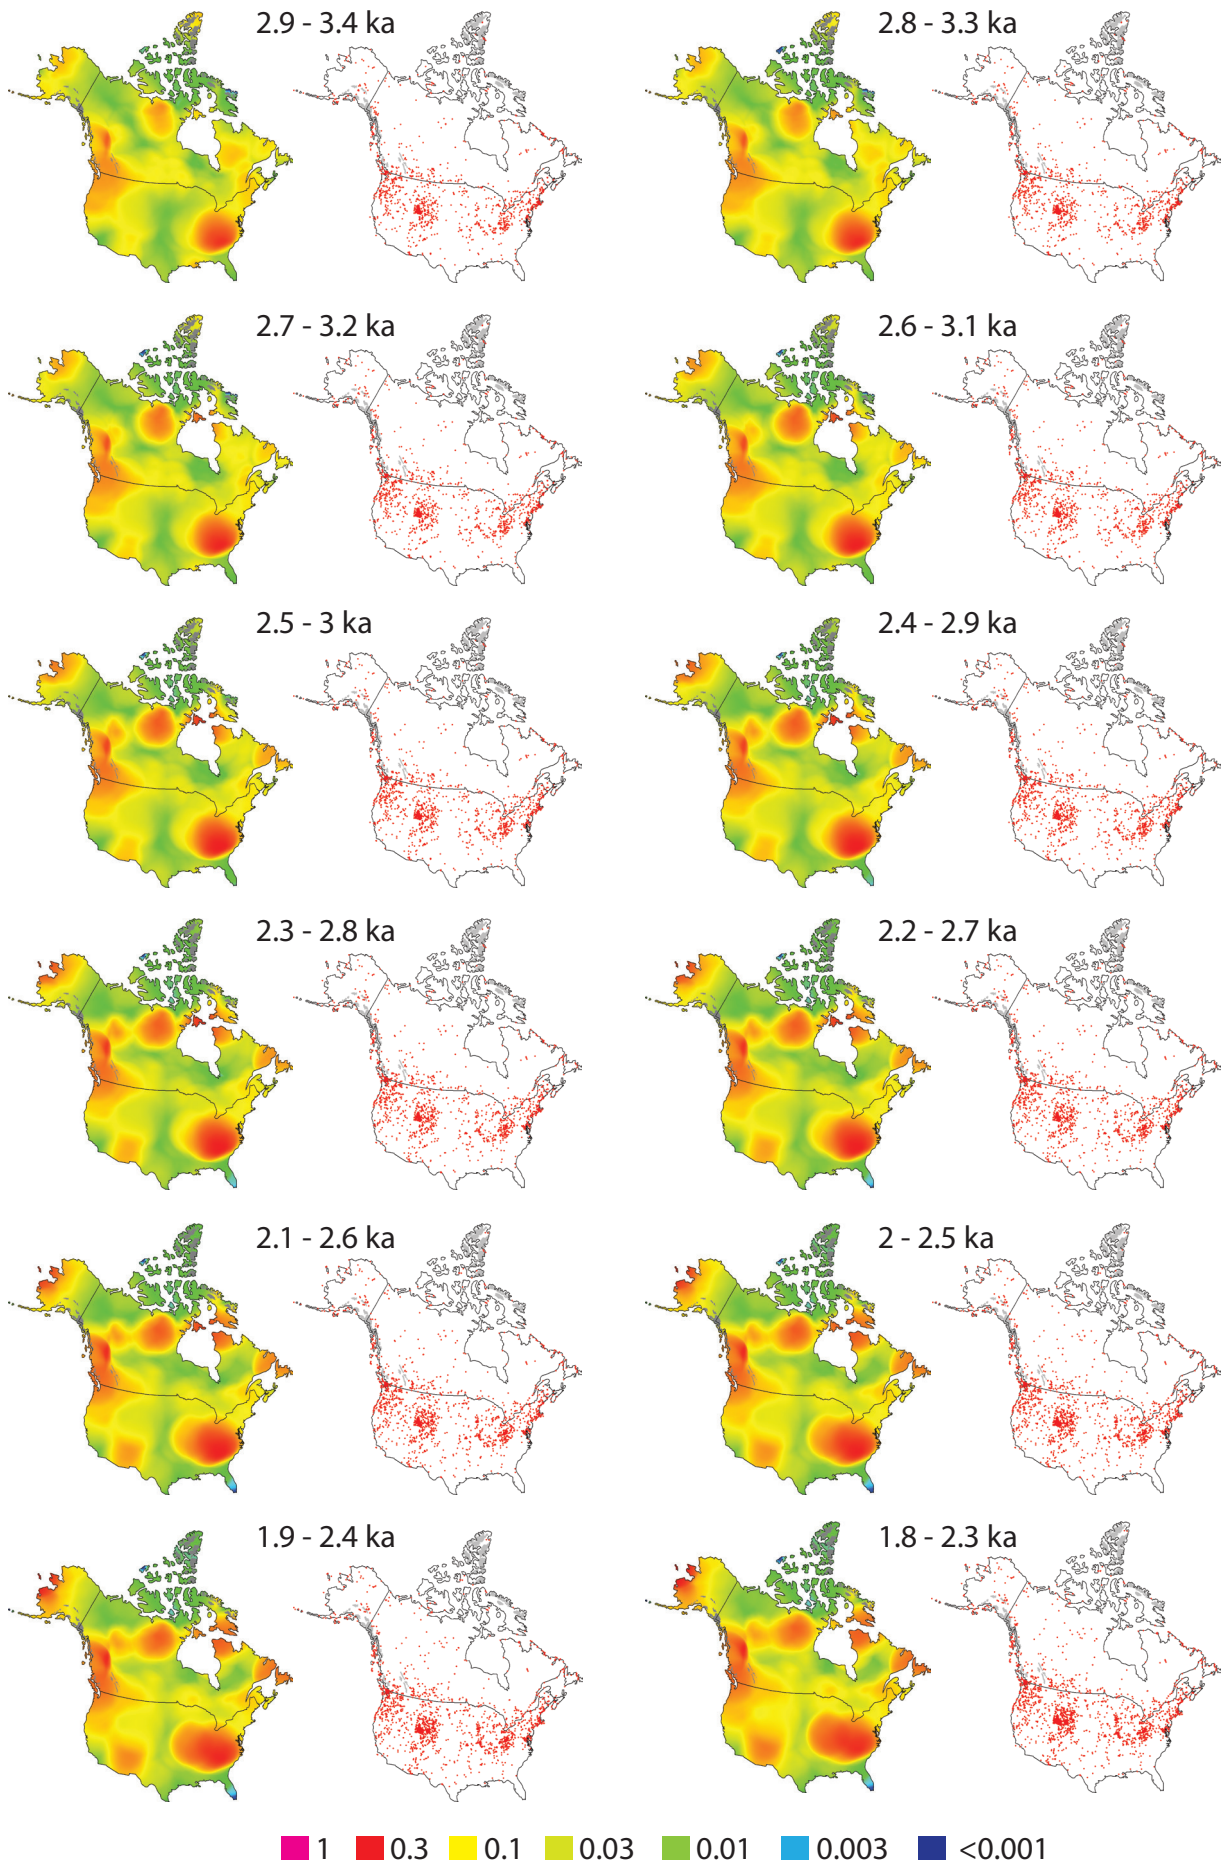

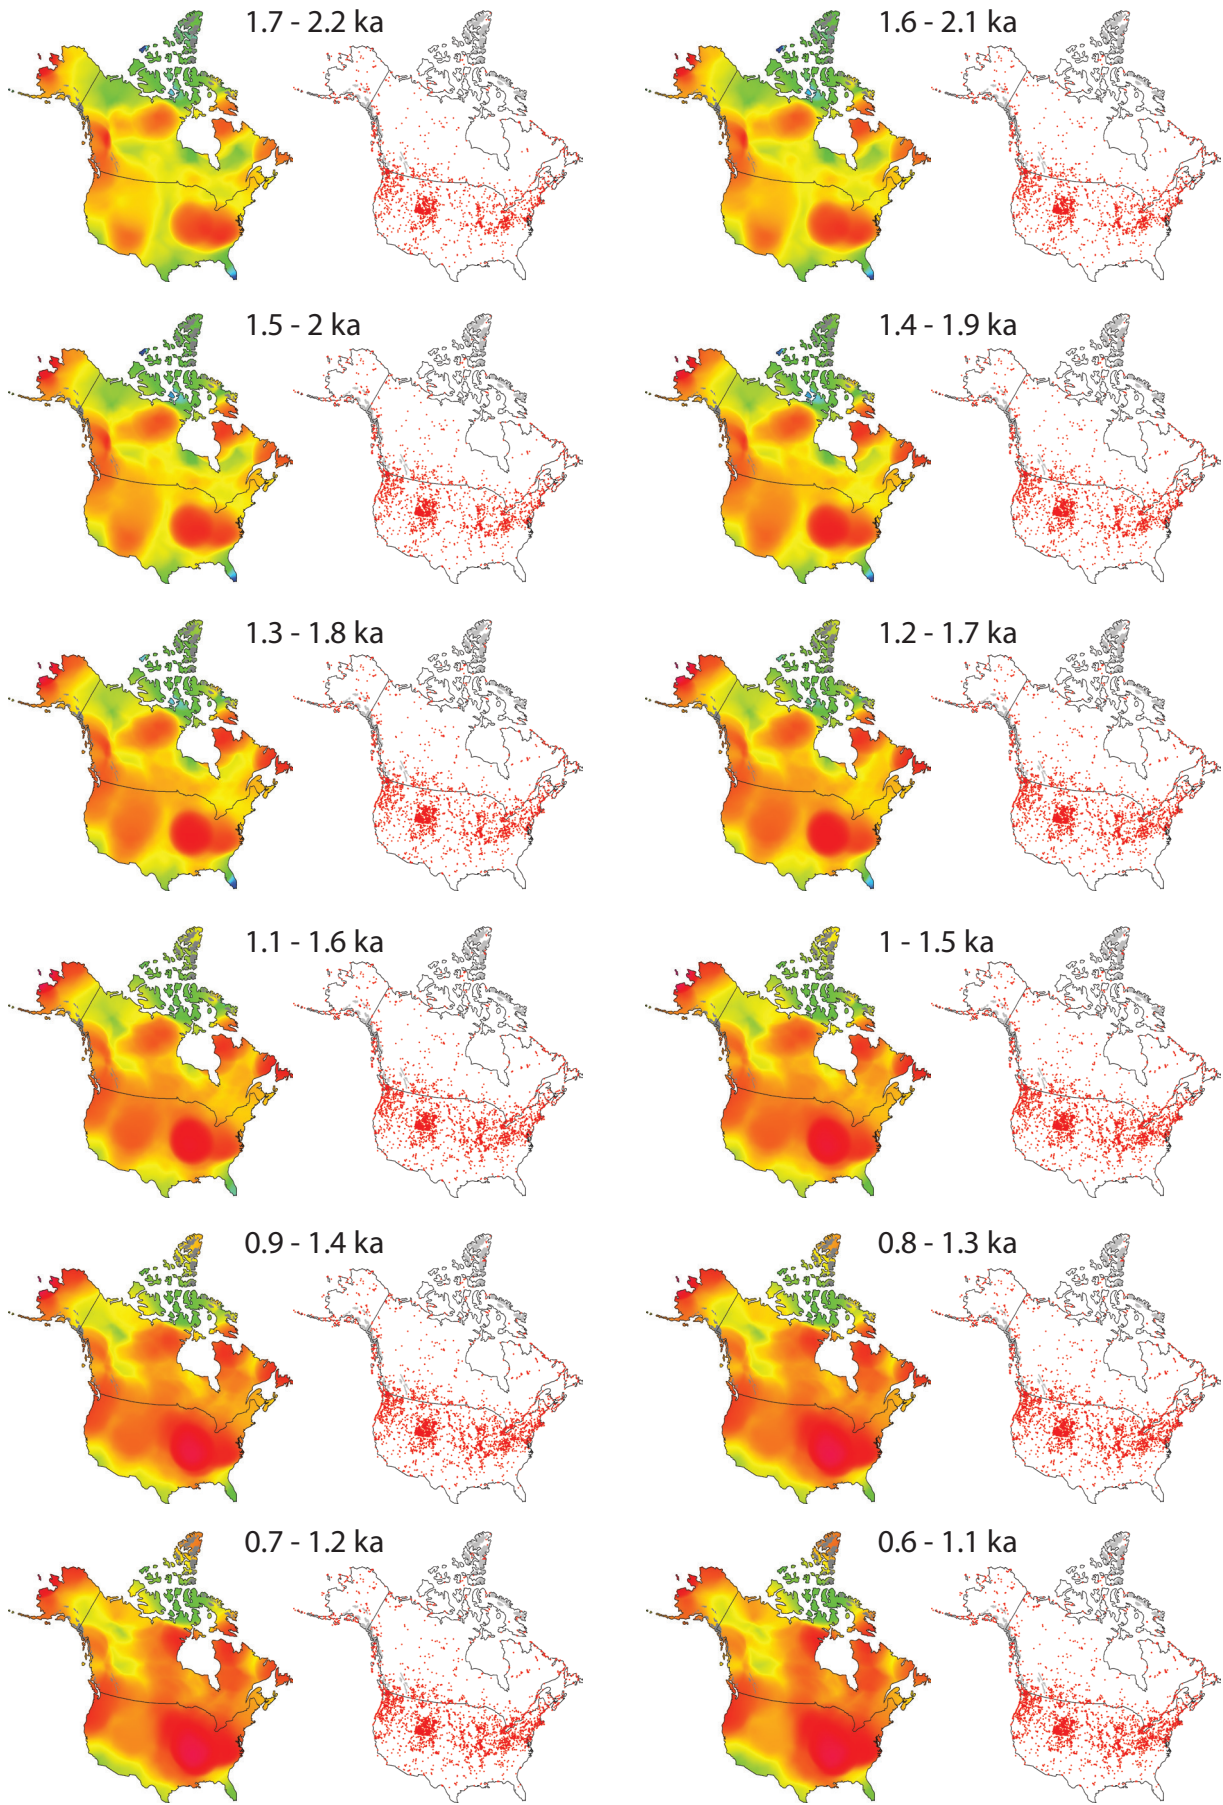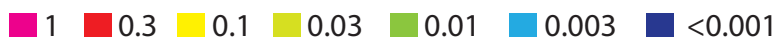

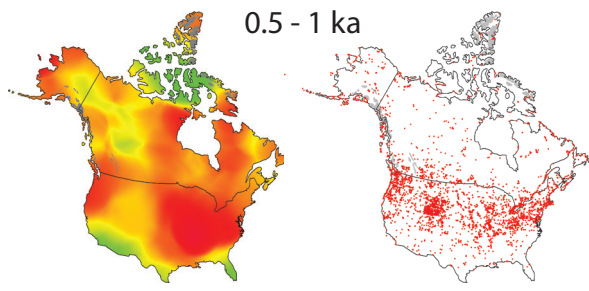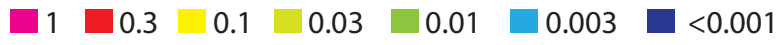

Supplement: pnas.1505657112.sfig01.pdf [file pnas.1505657112.sfig01.pdf]

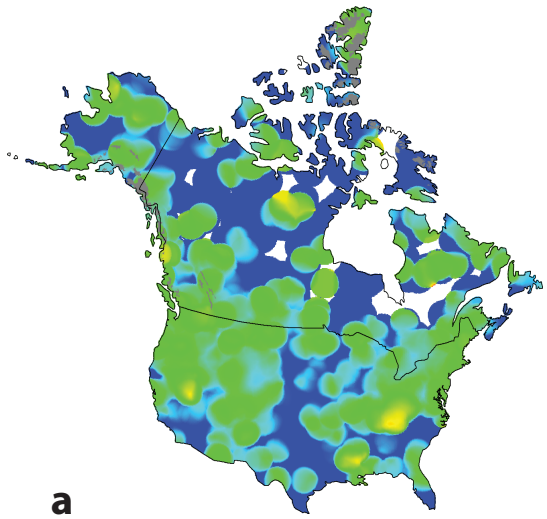

**a**

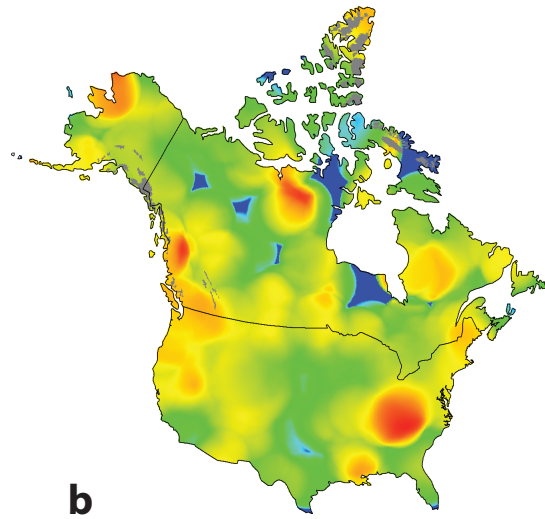

**b**

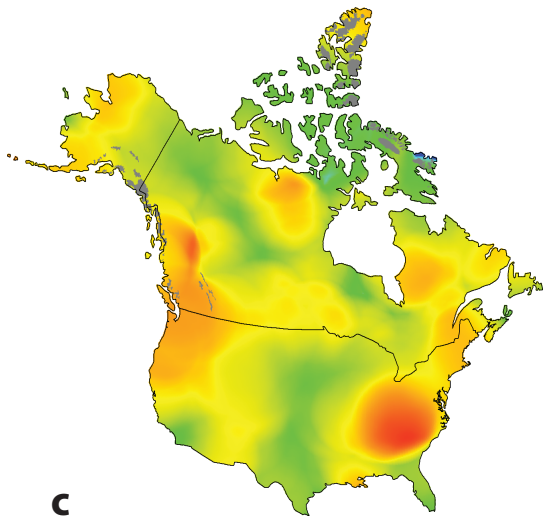

**c**

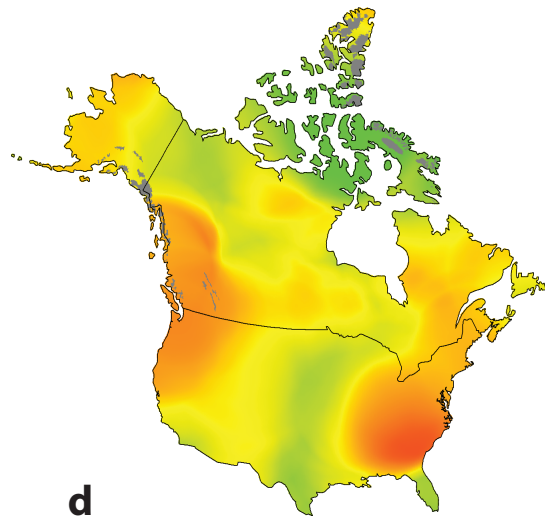

**d**

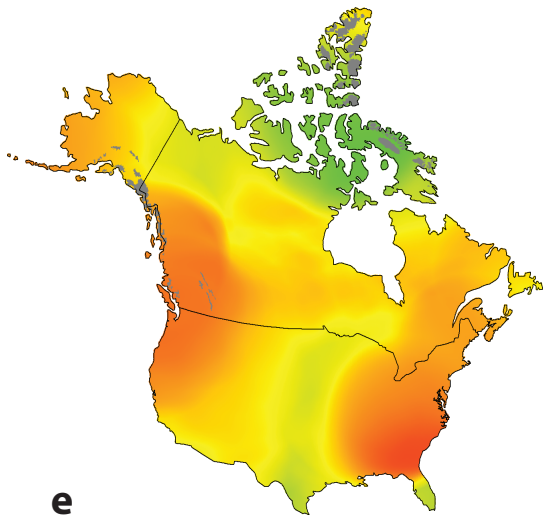

**e**

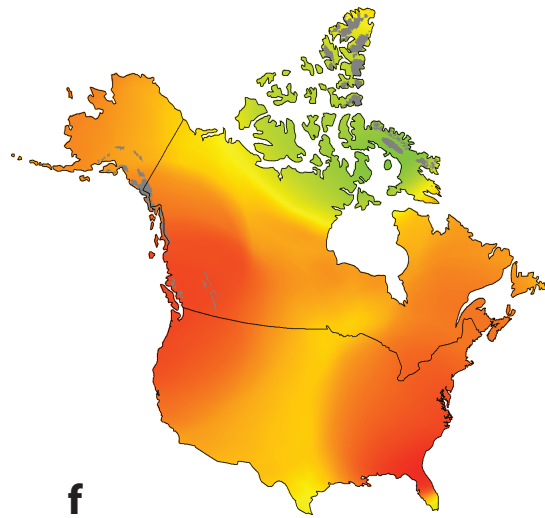

**f**

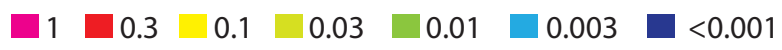

Supplement: pnas.1505657112.sfig02.pdf [file pnas.1505657112.sfig02.pdf]

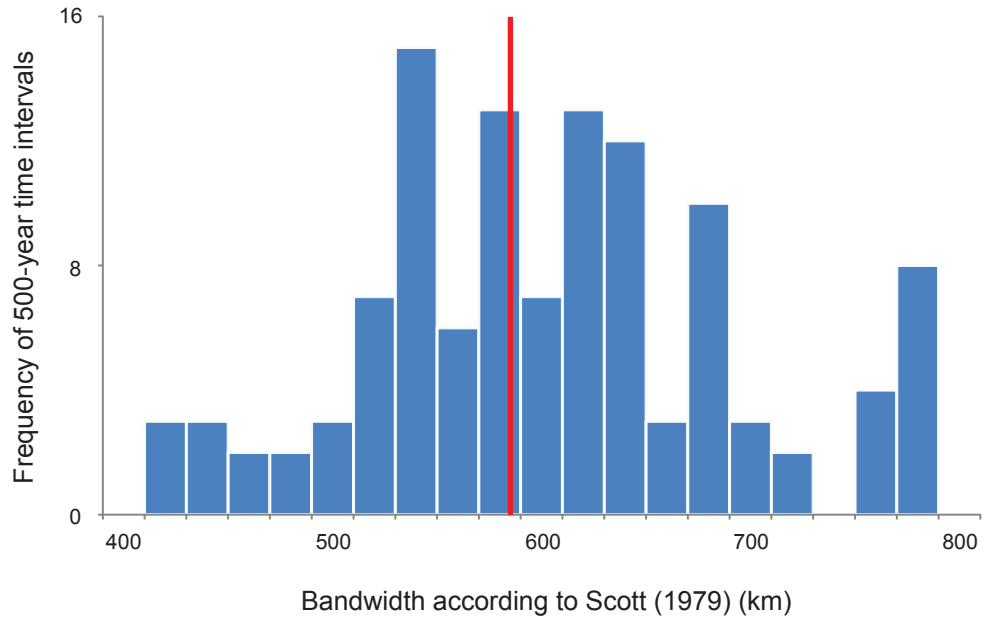

Supplement: pnas.1505657112.sfig03.pdf [file pnas.1505657112.sfig03.pdf]

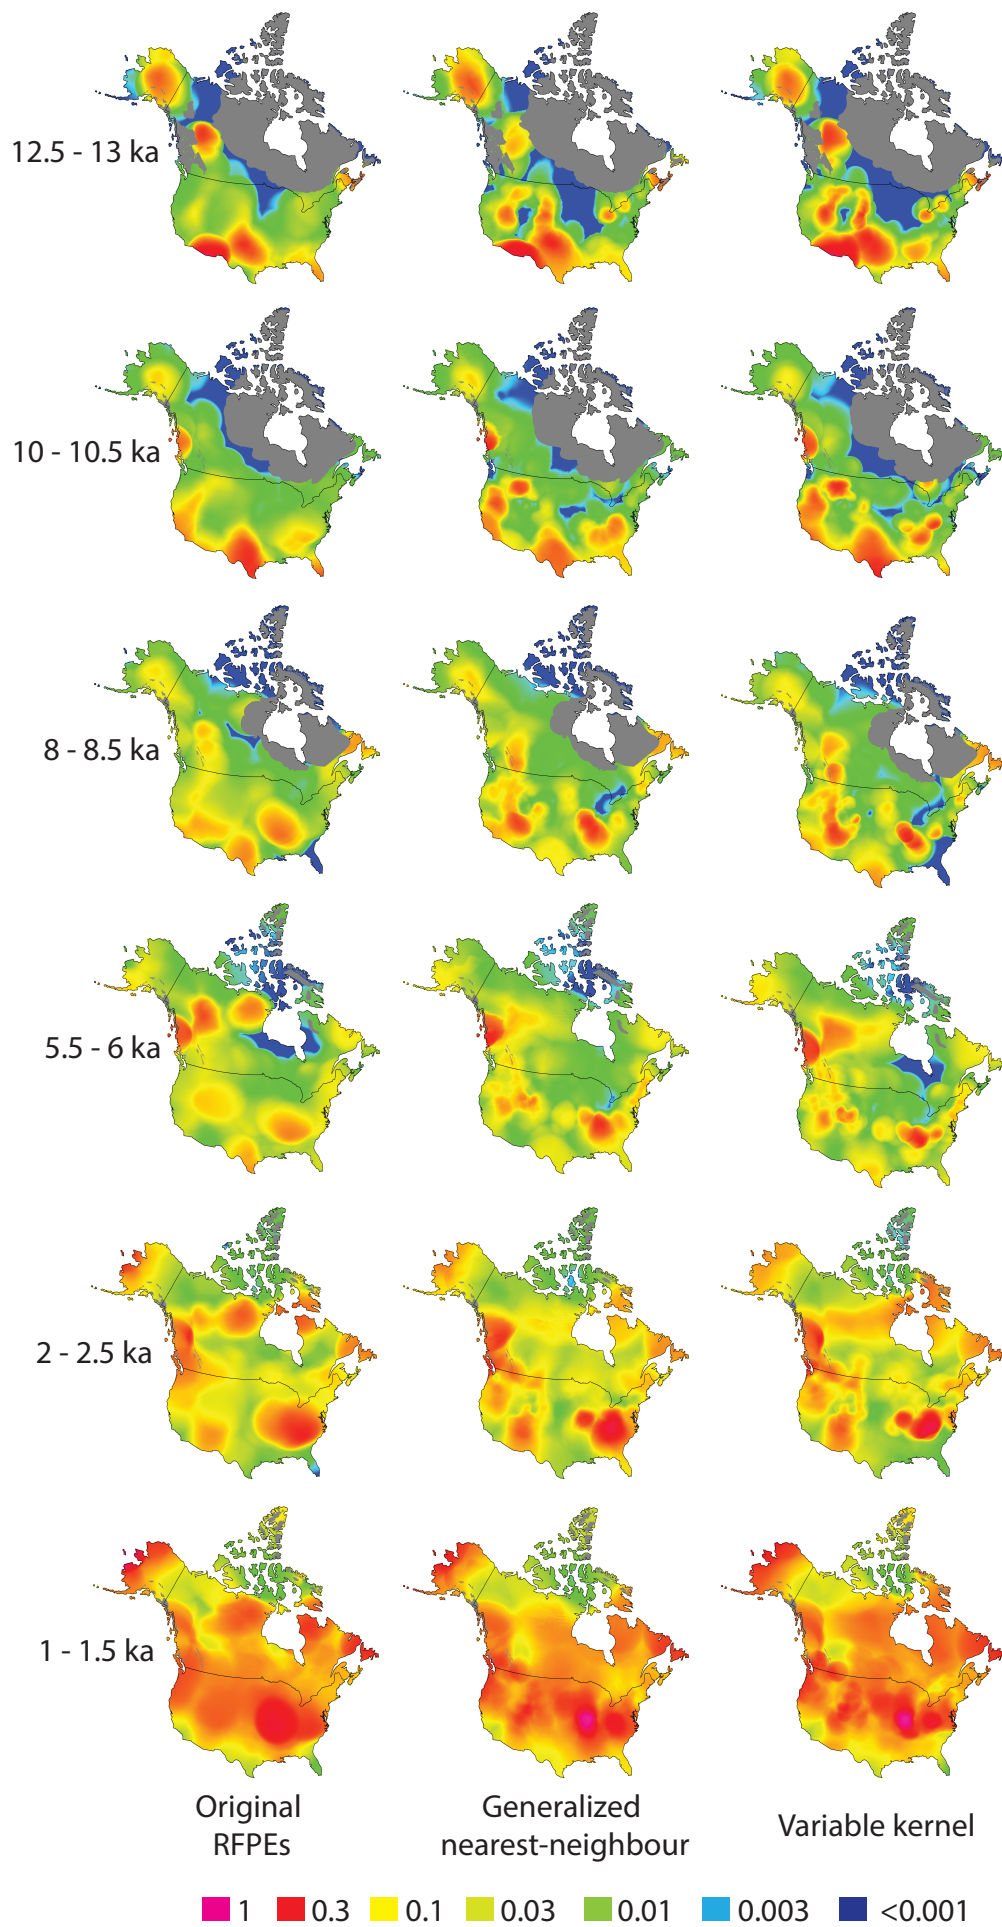

Supplement: pnas.1505657112.sfig04.pdf [file pnas.1505657112.sfig04.pdf]

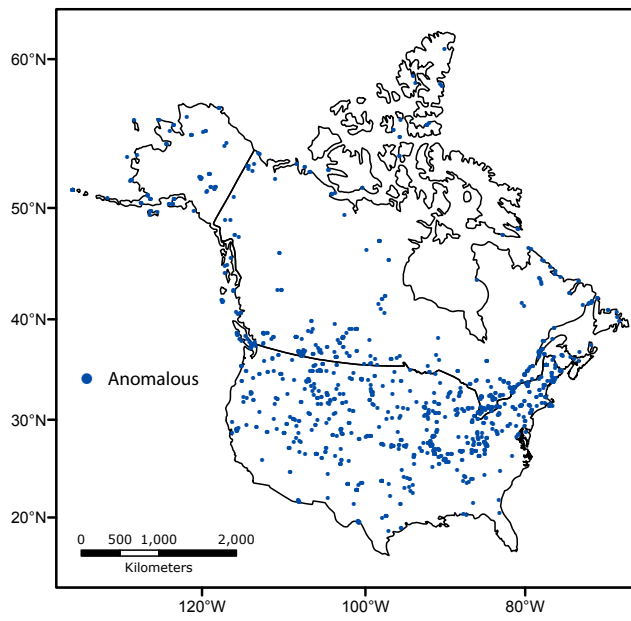

Supplement: pnas.1505657112.sfig05.pdf [file pnas.1505657112.sfig05.pdf]

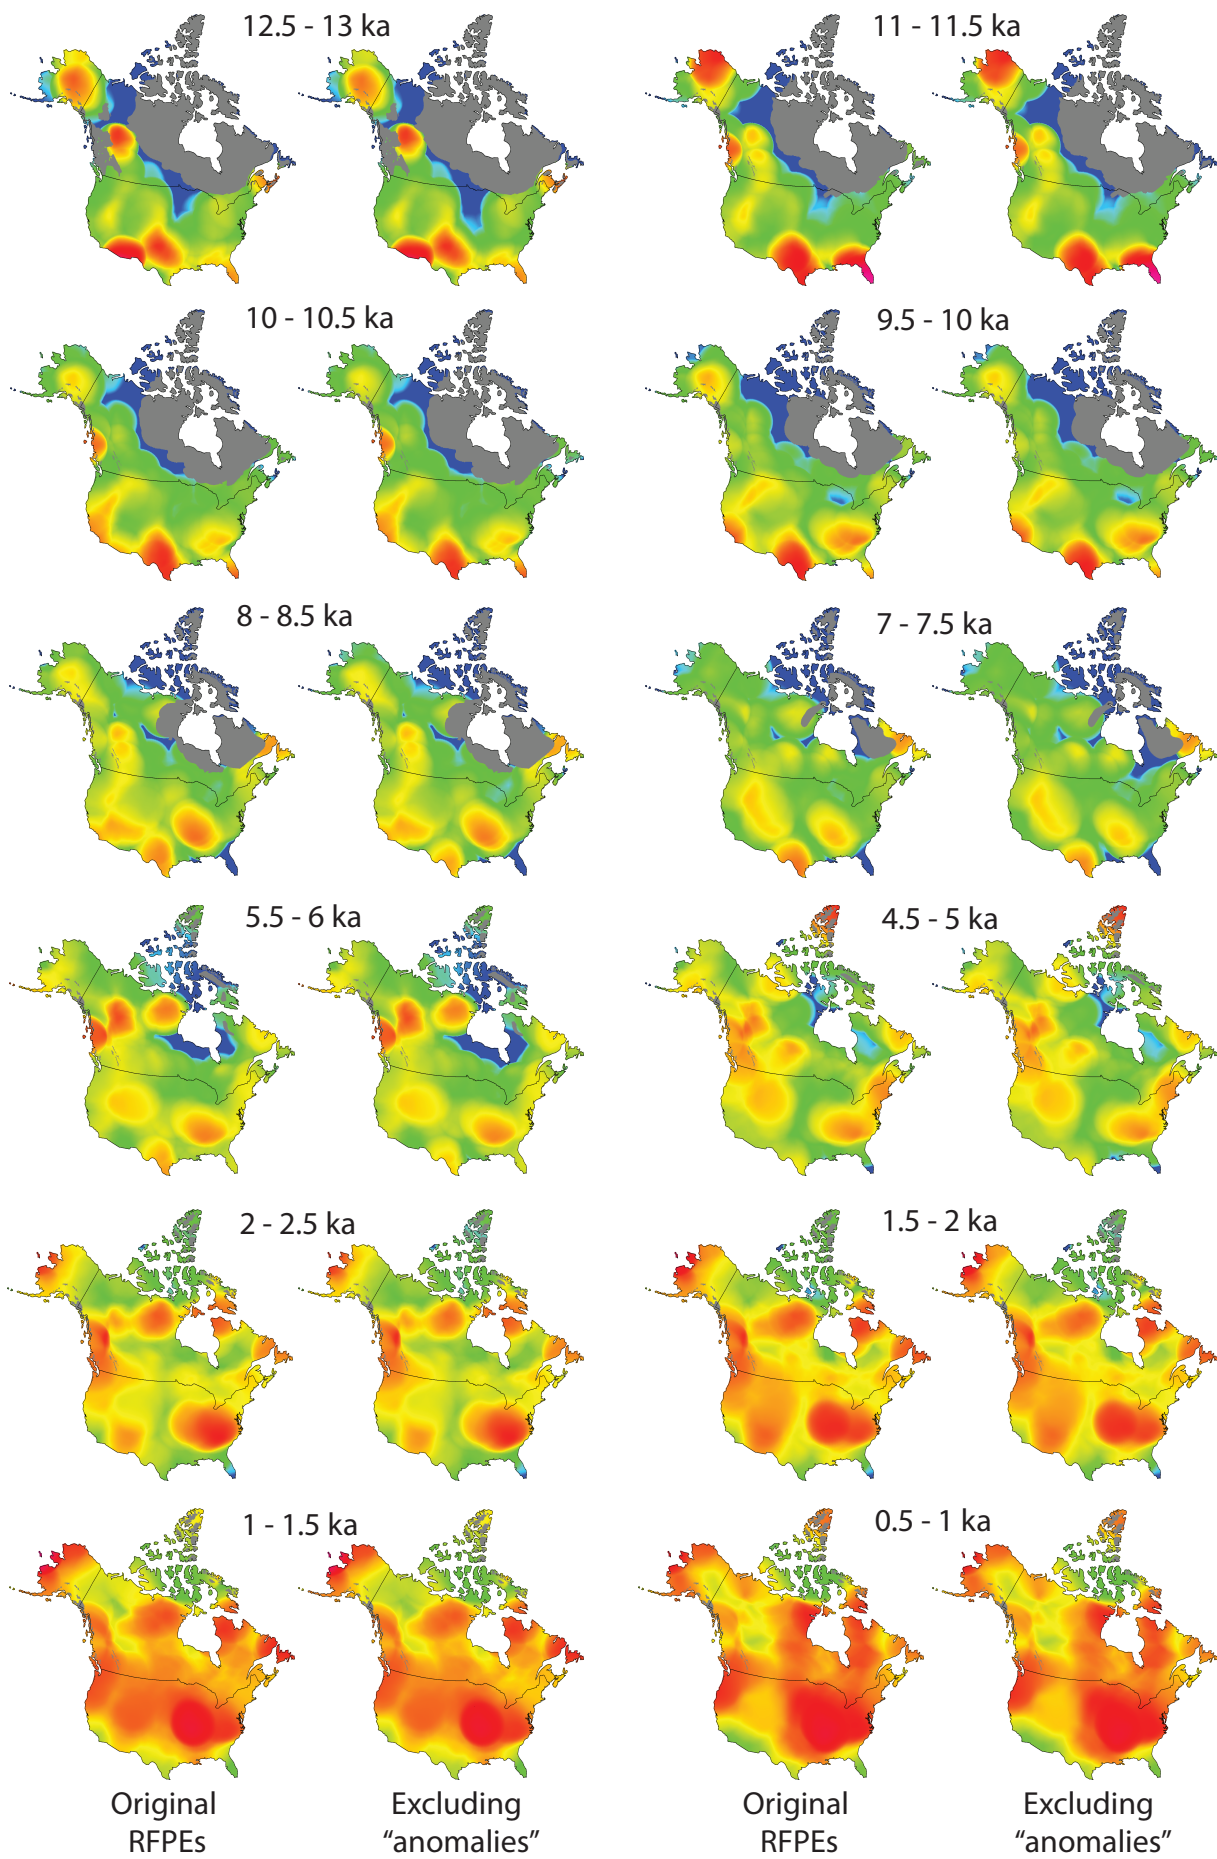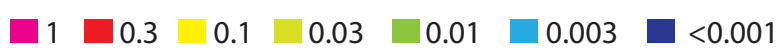

Supplement: pnas.1505657112.sfig06.pdf [file pnas.1505657112.sfig06.pdf]

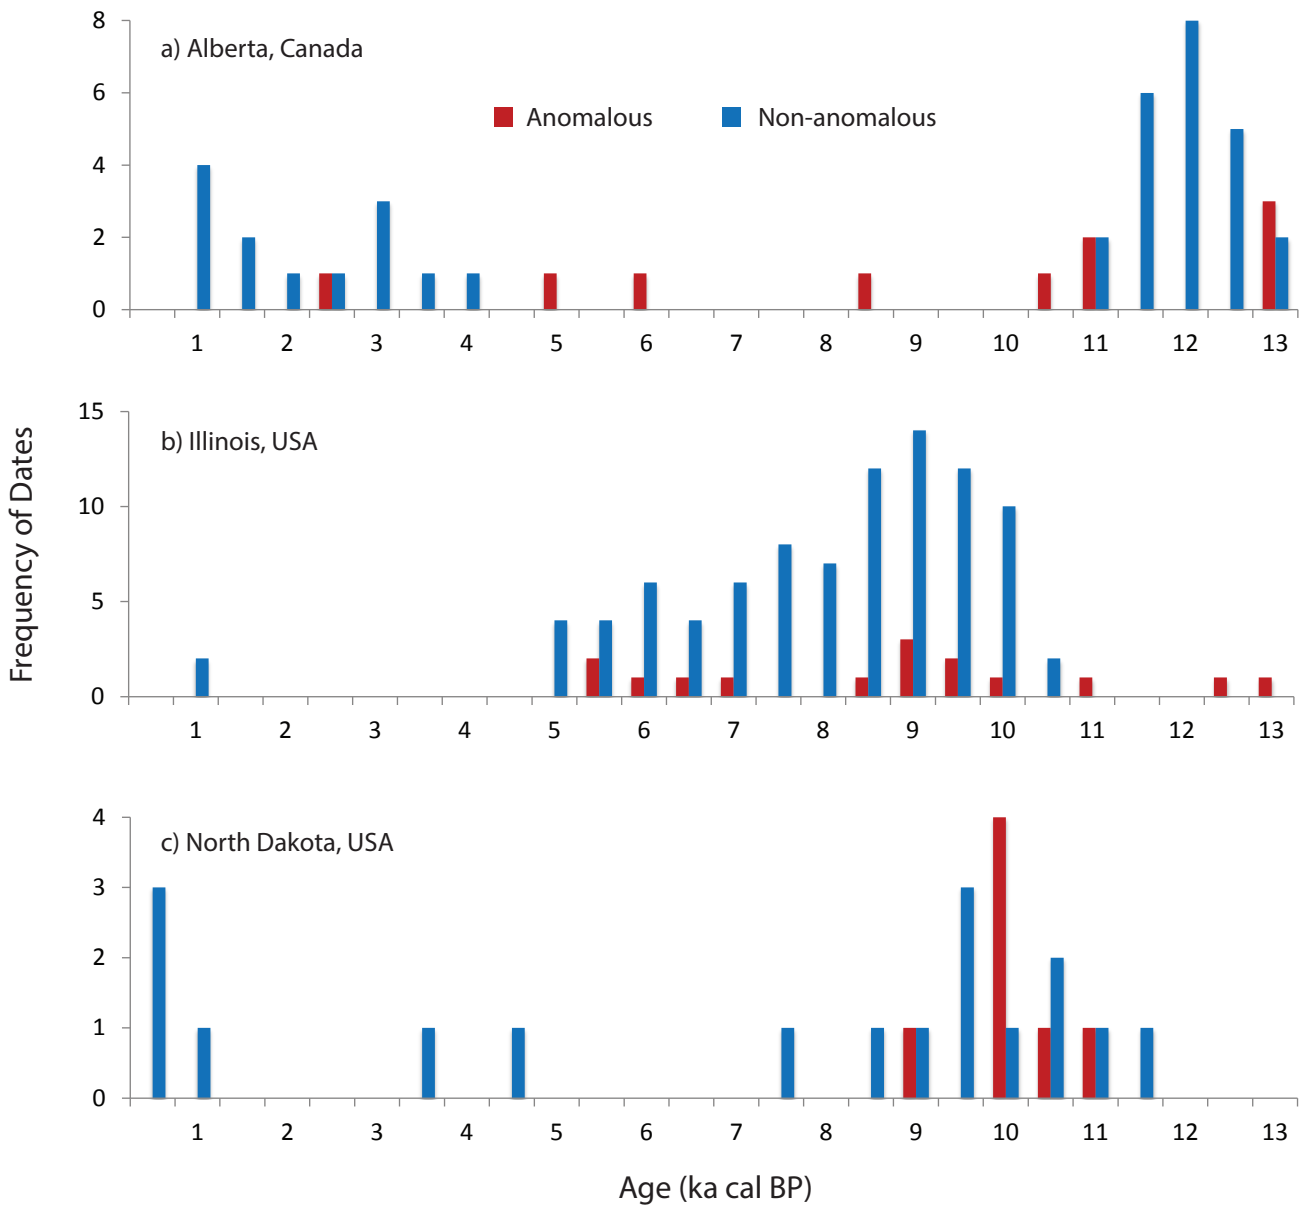

Supplement: pnas.1505657112.sfig07.pdf [file pnas.1505657112.sfig07.pdf]

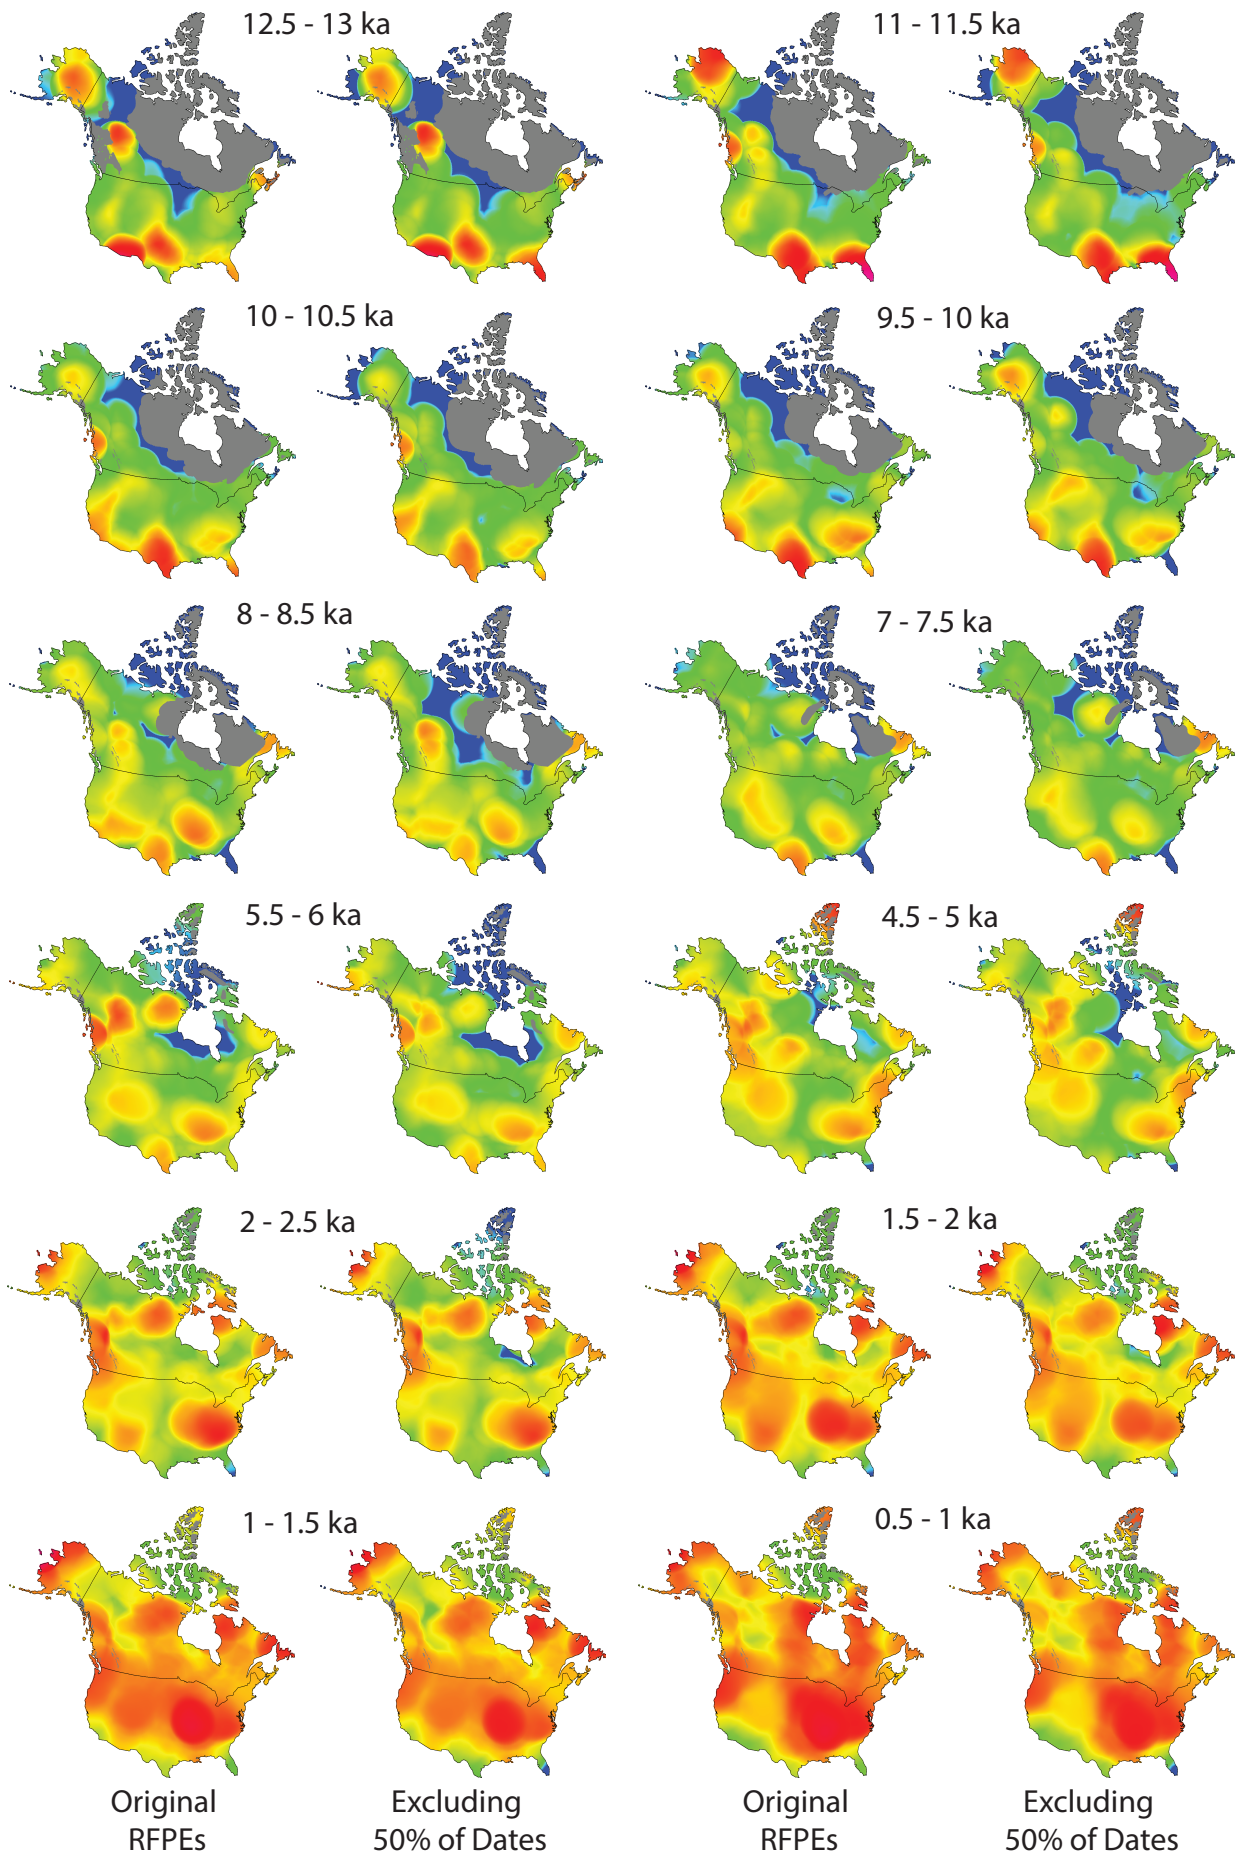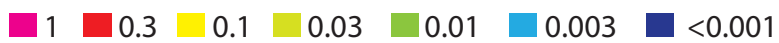

Supplement: pnas.1505657112.sfig08.pdf [file pnas.1505657112.sfig08.pdf]

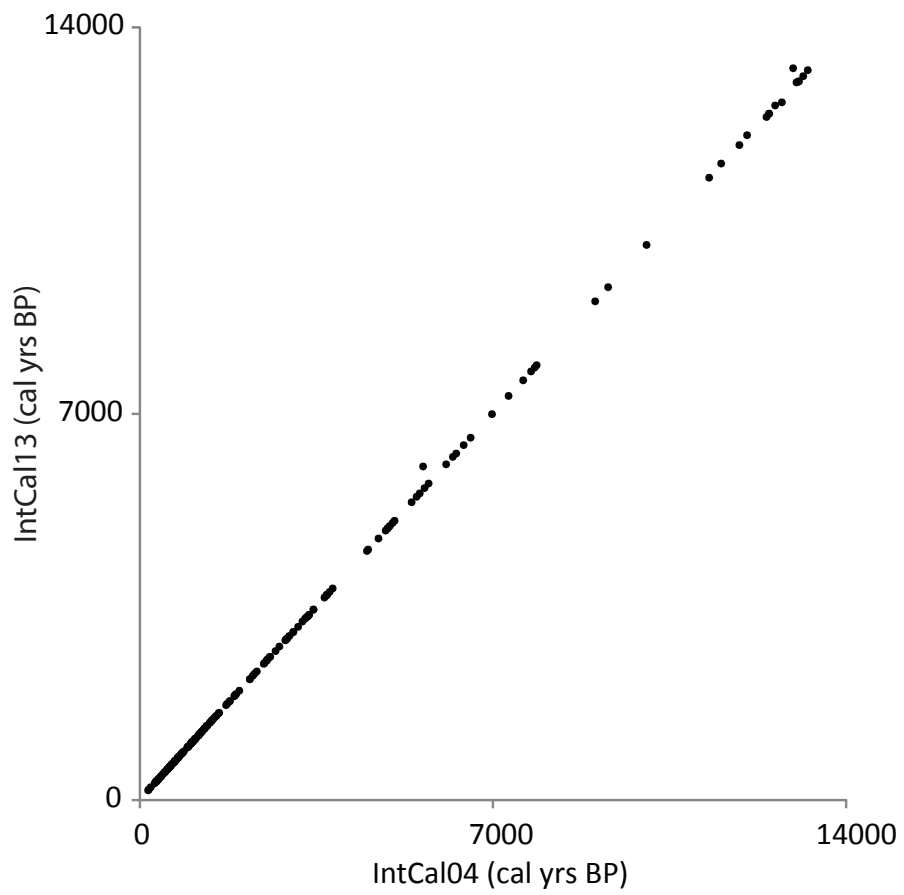

Supplement: pnas.1505657112.sfig09.pdf [file pnas.1505657112.sfig09.pdf]
